# Supplementary material
Source: MDPI journal article supplement (https://www.mdpi.com/2073-4441/12/1/66)
Supplement: s1 [file s1]

# Supplementary Material

## An Effective Method to Remove Antimony in Water by Using Iron-Based Coagulants

Kuan Cheng, Hongtao Wang, Jie Li, Fengting Li \*

College of Environmental Science and Engineering, State Key Laboratory of Pollution Control and Resource Reuse, Tongji University, Siping Rd 1239, 200092 Shanghai, China;

kuanchengtongji@163.com (K.C.); hongtao@tongji.edu.cn (H.W.); lijie2012tj@163.com (J.L.)

\* Correspondence: fengting@tongji.edu.cn

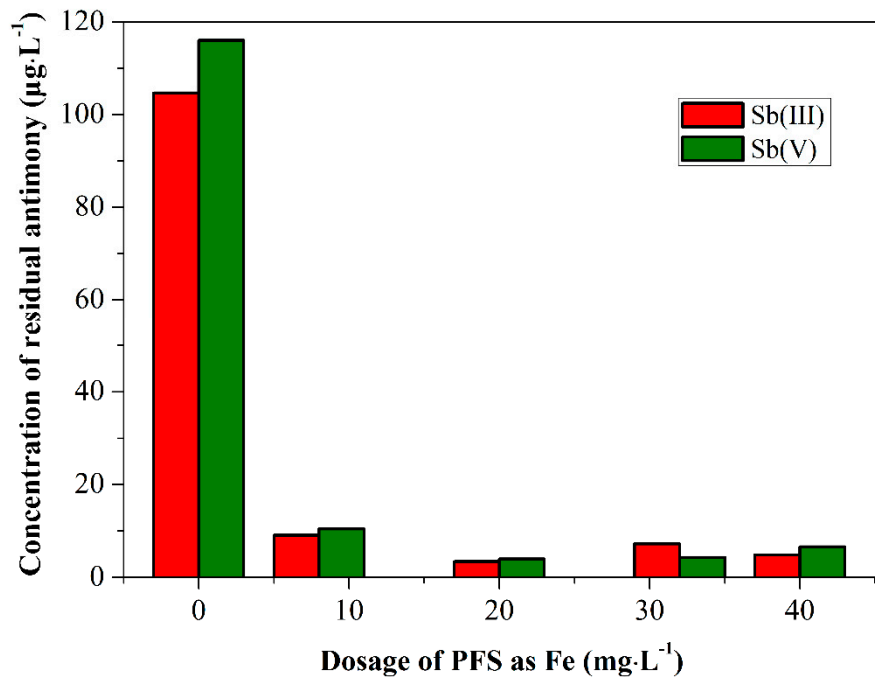

**Figure S1** Removal of Sb from Taihu lake water by coagulation using PFS (initial concentration of Sb(III): 104 µg·L<sup>-1</sup>; Sb(V): 116 µg·L<sup>-1</sup>).
